# Supplementary material for: Evaluation of air-soil temperature relationships simulated by land surface models during winter across the permafrost region
Source: Copernicus journal article supplement (doi:10.5194/tc-2016-36), 2016-03-11

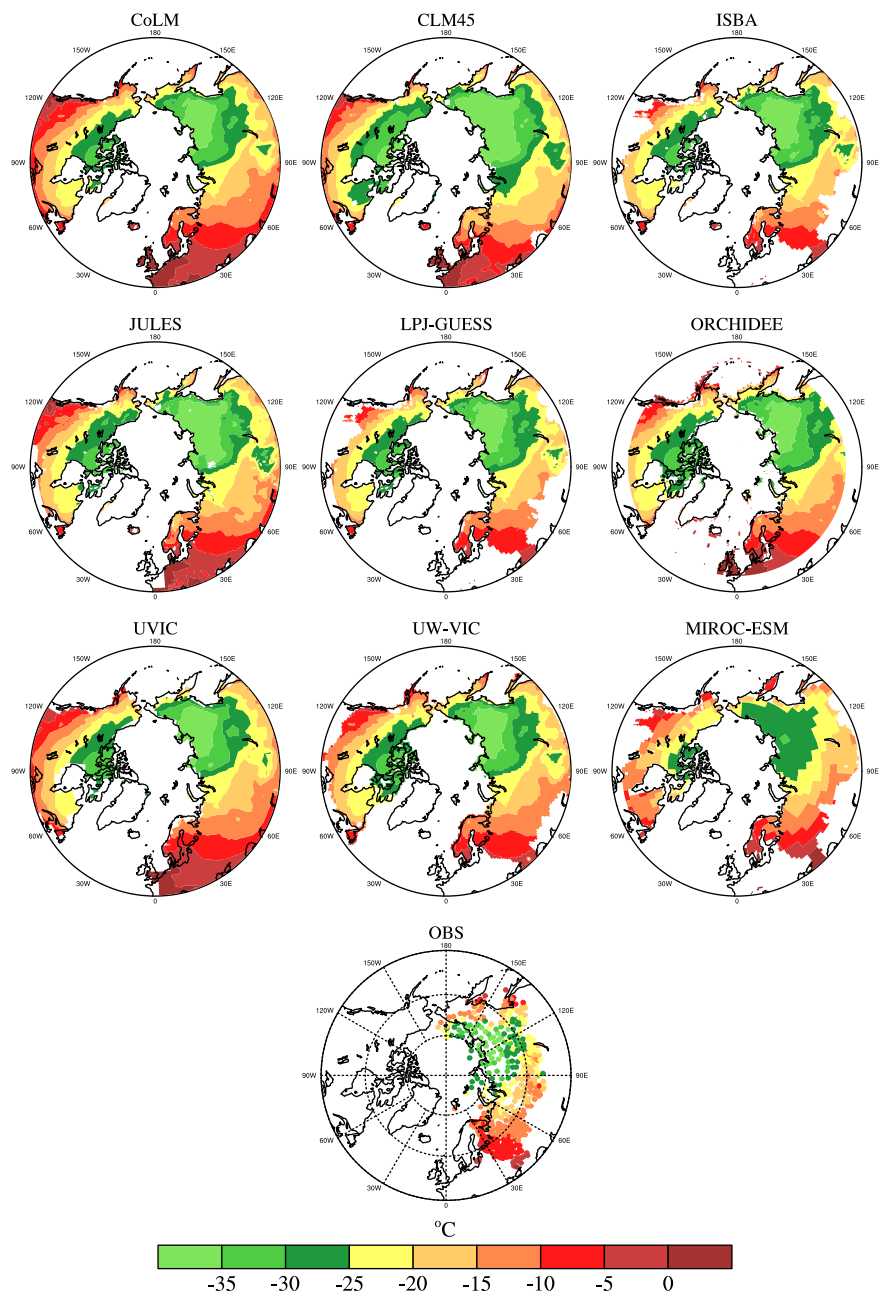

Supplement: Supplementary file [file SI-Fig.5.pdf › reply_to_reivewer/SI-Fig.5.pdf]
